# Supplementary material for: Origin of electrocatalytic nitrogen reduction activity over transition metal disulfides: critical role of in situ generation of S vacancy
Source: Royal Society of Chemistry journal article supplement (doi:10.1039/d4ta00307a), 2024-01-01
Supplement: d4ta00307a1.pdf [file d4ta00307a1.pdf]

## Electronic Supplementary Information

### Origin of electrocatalytic nitrogen reduction activity over transition metal disulfides: critical role of *in situ* generation of S vacancy

Tianyi Wang<sup>1</sup>, Zhongyuan Guo<sup>2</sup>, Hirofumi Oka<sup>1</sup>, Akichika Kumatani<sup>1,3,4,5,\*</sup>, Chuangwei Liu<sup>6,\*</sup>, and Hao Li<sup>1,\*</sup>

<sup>1</sup> *Advanced Institute for Materials Research (WPI-AIMR), Tohoku University, Sendai, 980-8577, Japan*

<sup>2</sup> *College of Environmental and Resource Sciences, Zhejiang University, Hangzhou, 310058, China*

<sup>3</sup> *Institute of Engineering Innovation (IEI), School of Engineering, The University of Tokyo, Tokyo, 113-8656, Japan*

<sup>4</sup> *Precursory Research for Embryonic Science and Technology (PRESTO), Japan Science and Technology Agency (JST), Saitama 332-0012, Japan*

<sup>5</sup> *Graduate School of Environmental Studies & Center for Science and Innovation in Spintronics (CSIS), Tohoku University, Sendai, Miyagi 980-8579, Japan*

<sup>6</sup> *Key Lab for Anisotropy and Texture of Materials School of Materials Science and Engineering, Northeastern University, Shenyang, 110819, China*

#### \* Corresponding Authors

Email: [kumatani@g.ecc.u-tokyo.ac.jp](mailto:kumatani@g.ecc.u-tokyo.ac.jp) (A. K.)

Email: [liucw@mail.neu.edu.cn](mailto:liucw@mail.neu.edu.cn) (C. L.)

Email: [li.hao.b8@tohoku.ac.jp](mailto:li.hao.b8@tohoku.ac.jp) (H. L.)

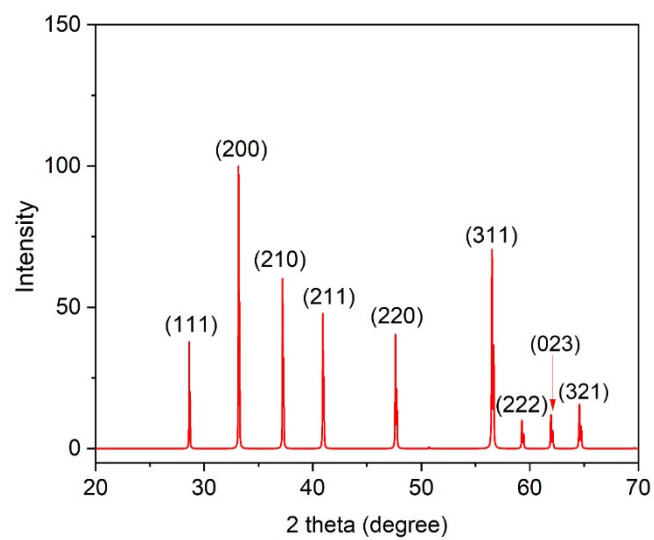

**Figure S1** The grazing-incidence X-ray diffraction of FeS<sub>2</sub>.<sup>1</sup>

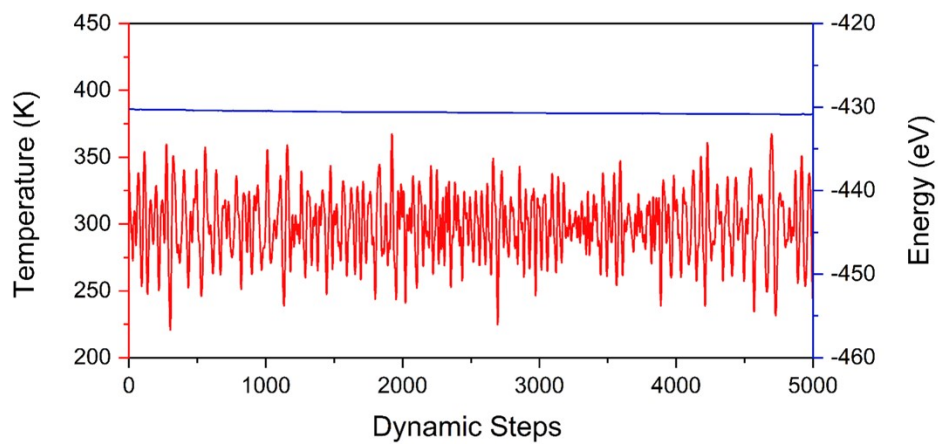

**Figure S2** The temperature and energy fluctuations of  $\text{FeS}_{2-x}(111)\text{-S}_{1V}$  during 10 ps of *ab initio* molecular dynamics (AIMD) simulations.

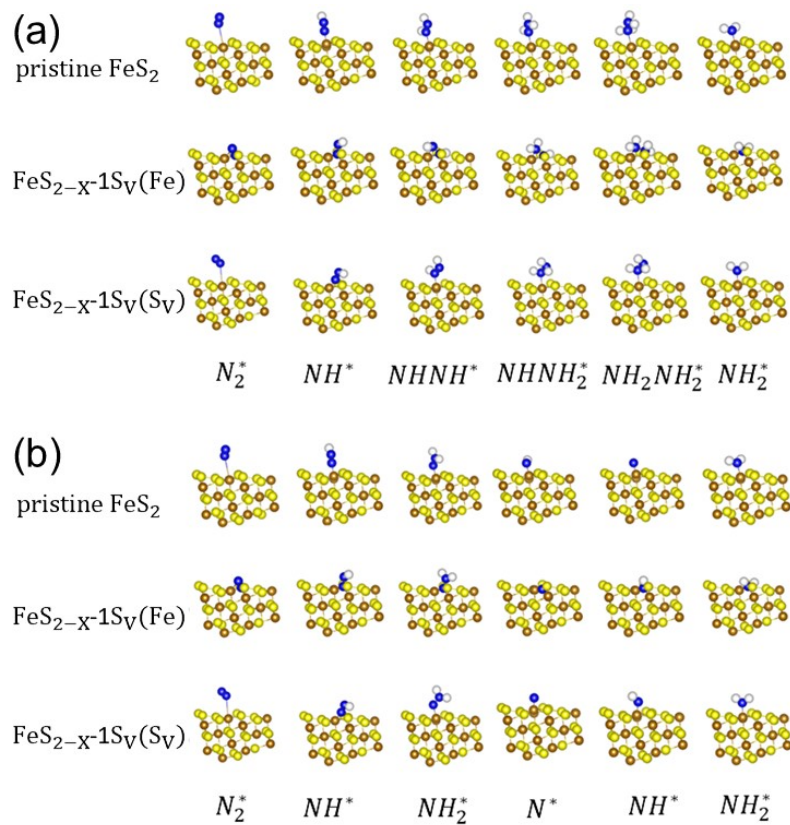

**Figure S3** The optimized configurations of the elementary steps on FeS<sub>2</sub>(111) and FeS<sub>2-x</sub>(111)-1S<sub>v</sub> via (a) the alternating and (b) distal pathways.

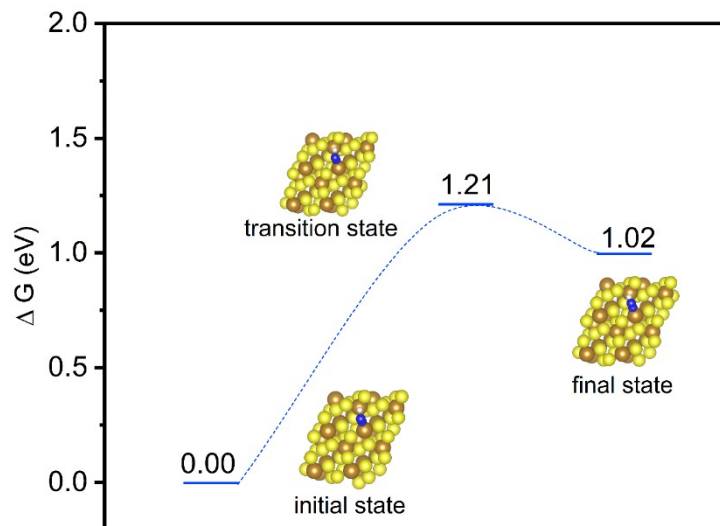

**Figure S4** The transition state of  $N_2^* + H^* \rightarrow NNH^*$  at the Fe site of  $FeS_{2-x}(111)-1S_V$ .

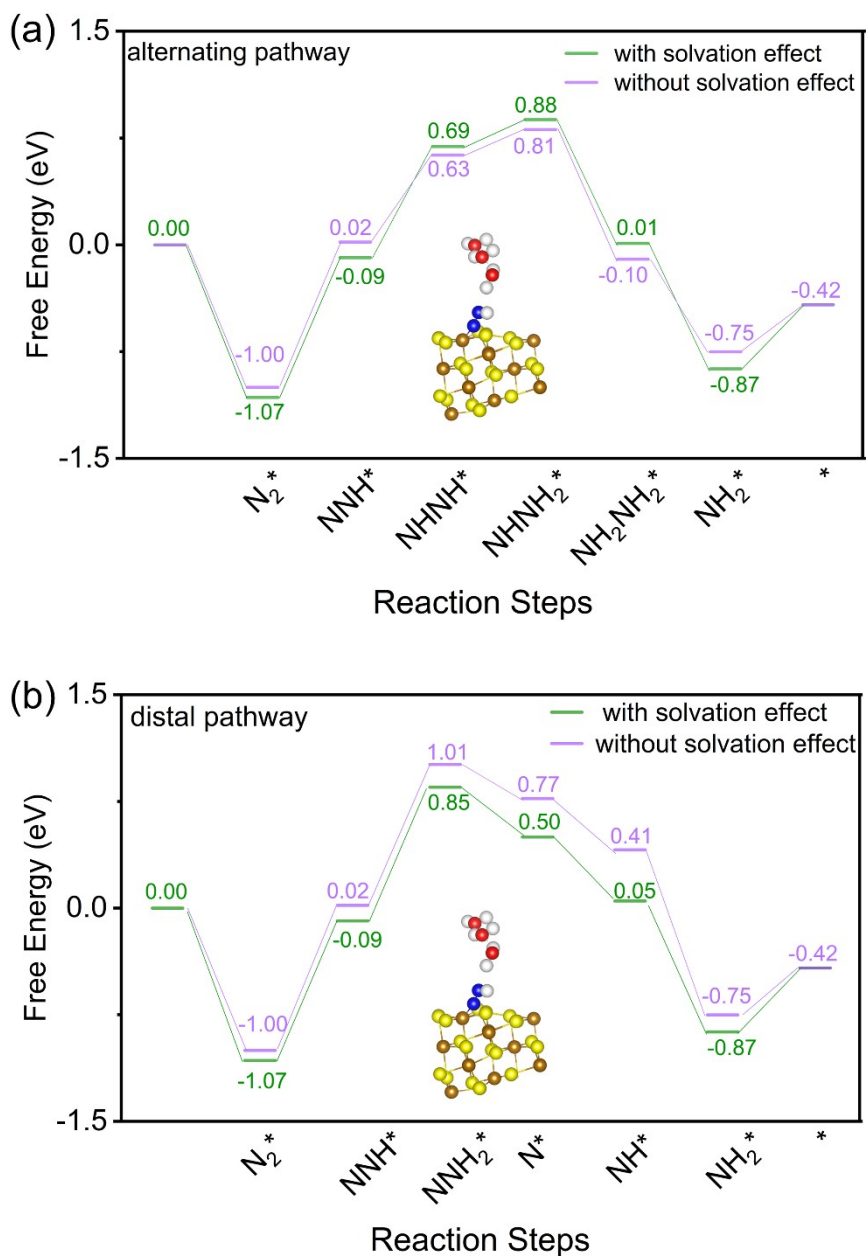

**Figure S5** The energy profiles of ENRR over  $FeS_{2-x}(111)-1S_V$  surfaces at the Fe active site *via* the (a) associative and (b) distal mechanism with and without solvation effects. The optimized  $NNH^*$  with explicit water molecules is inserted. The Fe, S, N, O and H are indicated as brown, yellow, blue, red, and white, respectively.

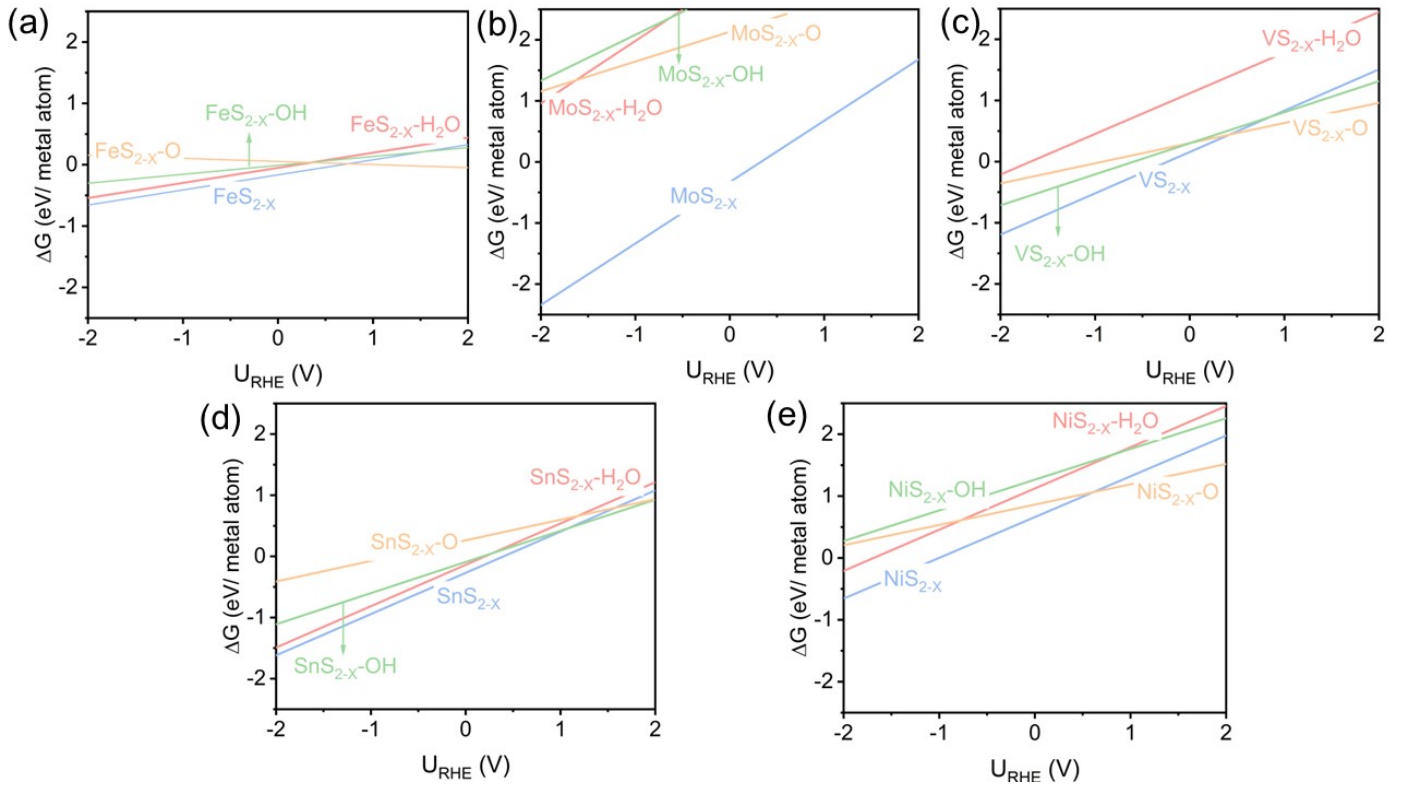

**Figure S6** The surface Pourbaix diagrams of occupied  $H_2O^*$ ,  $HO^*$ , and  $O^*$  on the  $TMS_{2-x}$  surfaces.

**Table S1** The highest NH<sub>3</sub> yield, highest Faradic efficiency, and the located potential of FeS<sub>2</sub>-based catalysts via experimental studies.

| Catalysts                                   | NH <sub>3</sub> yield                                  | Faradic efficiency (%) | Potential (V vs. RHE) | Refs |
|---------------------------------------------|--------------------------------------------------------|------------------------|-----------------------|------|
| FeS <sub>2</sub> /MoS <sub>2</sub> @rGO     | 41.1 $\mu\text{g h}^{-1} \text{mg}_{cat}^{-1}$         | 38.6                   | -0.2                  | 2    |
| FeS <sub>2</sub>                            | 37.2 $\mu\text{g h}^{-1} \text{mg}_{cat}^{-1}$         | 11.2                   | -0.5                  | 3    |
| FeS <sub>2</sub> /rGO                       | 27.9 $\mu\text{g h}^{-1} \text{mg}_{cat}^{-1}$         | 6.8                    | -0.3                  | 4    |
| Sv-FeS <sub>2</sub>                         | 11.5 $\mu\text{g h}^{-1} \text{mg}_{cat}^{-1}$         | 14.6                   | -0.2                  | 5    |
| MoS <sub>2</sub> -FeS <sub>2</sub> /Fe foam | $7.1 \times 10^{-10} \text{mol s}^{-1} \text{cm}^{-2}$ | 4.6                    | -0.5                  | 6    |
| Mo-FeS <sub>2</sub>                         | 25.15 $\mu\text{g h}^{-1} \text{mg}_{cat}^{-1}$        | 14.4                   | -0.2                  | 7    |
| Sn-FeS <sub>2</sub>                         | 15.8 $\text{mg h}^{-1} \text{cm}^{-2}$                 | 96.7                   | -0.5                  | 8    |

**Table S2** The calculated surface energies of different FeS<sub>2</sub> facets.

| Facet | $E^{unr}$ | $E^{real}$ | a     | b    | Surface energy (J/m <sup>2</sup> ) |         |
|-------|-----------|------------|-------|------|------------------------------------|---------|
|       | (eV)      | (eV)       | (Å)   | (Å)  | unrelaxed                          | relaxed |
| 111   | -180.26   | -181.54    | 10.93 | 7.00 | 1.17                               | 1.03    |
| 200   | -88.48    | -89.27     | 4.44  | 5.41 | 2.40                               | 2.14    |
| 210   | -174.47   | -176.80    | 10.93 | 7.00 | 1.77                               | 1.53    |
| 211   | -173.57   | -176.36    | 10.93 | 7.00 | 1.86                               | 1.57    |
| 311   | -169.66   | -172.44    | 10.93 | 7.00 | 2.27                               | 1.98    |



**Table S3** The free energies of NNH\* formation, NH<sub>3</sub>\* formation, and NH<sub>3</sub>\* desorption on FeS<sub>2-x</sub>.

| Reaction step                     | Free energy (eV) |
|-----------------------------------|------------------|
| $N_2^* + H^* \rightarrow NNH^*$   | 1.02             |
| $NH_2^* + H^* \rightarrow NH_3^*$ | -0.51            |
| $NH_3^* \rightarrow NH_3(g)$      | 0.84             |

**Table S4.** The adsorption free energies of N<sub>2</sub> and NH<sub>3</sub> on FeS<sub>2-x</sub> surface.

| Species                     | N <sub>2</sub> | NH <sub>3</sub> |
|-----------------------------|----------------|-----------------|
| Adsorption free energy (eV) | -1.00          | -0.51           |

**Table S5** The energy barrier of N<sub>2</sub> adsorption and NNH\* formation over FeS<sub>2-x</sub>(111)-1S<sub>v</sub> surfaces at Fe active site with and without U correction.

|                       | $\Delta G\text{-DFT (eV)}$ | $\Delta G\text{-DFT+U (eV)}$ |
|-----------------------|----------------------------|------------------------------|
| *+N <sub>2</sub> →NN* | -1.00                      | -1.06                        |
| NN*+H*→NNH*           | 1.02                       | 1.11                         |

**Table S6** The highest NH<sub>3</sub> yield, highest Faradic efficiency, and the located potential of TMS<sub>2</sub>-based catalysts *via* experimental studies.

| Catalysts                                       | NH <sub>3</sub> yield                                  | Faradic efficiency<br>(%) | Potential<br>(V vs. RHE) | Refs |
|-------------------------------------------------|--------------------------------------------------------|---------------------------|--------------------------|------|
| B-VS <sub>2</sub>                               | 55.7 $\mu\text{g h}^{-1} \text{mg}_{cat}^{-1}$         | 16.4                      | -0.4                     | 9    |
| Mo-SnS <sub>2</sub>                             | 41.3 $\mu\text{g h}^{-1} \text{mg}_{cat}^{-1}$         | 20.8                      | -0.4                     | 10   |
| V-NiS <sub>2</sub>                              | 47.63 $\mu\text{g h}^{-1} \text{mg}_{cat}^{-1}$        | 9.37                      | -0.35                    | 11   |
| Sv-MoS <sub>2</sub>                             | 29.28 $\mu\text{g h}^{-1} \text{mg}_{cat}^{-1}$        | 8.34                      | -0.4                     | 12   |
| MoS <sub>2</sub> -PDR                           | 43.4 $\pm$ 3 $\mu\text{g h}^{-1} \text{mg}_{cat}^{-1}$ | 16.8 $\pm$ 2              | -0.3                     | 13   |
| Sv-MoS <sub>2</sub>                             | 23.38 $\mu\text{g h}^{-1} \text{mg}_{cat}^{-1}$        | 17.9                      | -0.35                    | 14   |
| Li-S/MoS <sub>2</sub>                           | 43.4 $\mu\text{g h}^{-1} \text{mg}_{cat}^{-1}$         | 9.81                      | -0.2                     | 15   |
| MoS <sub>2</sub> /C <sub>3</sub> N <sub>4</sub> | 18.5 $\mu\text{g h}^{-1} \text{mg}_{cat}^{-1}$         | 17.5                      | -0.3                     | 16   |
| Sn-SnS <sub>2</sub>                             | 23.8 $\mu\text{g h}^{-1} \text{mg}_{cat}^{-1}$         | 6.5                       | -0.7                     | 17   |
| MoS <sub>2</sub> -rGO                           | 24.82 $\mu\text{g h}^{-1} \text{mg}_{cat}^{-1}$        | 4.56                      | -0.45                    | 18   |
| MoS <sub>2</sub> /CN                            | 36.1 $\mu\text{g h}^{-1} \text{mg}_{cat}^{-1}$         | 15.2                      | -0.5                     | 19   |
| Fe-MoS <sub>2</sub>                             | 20.11 $\mu\text{g h}^{-1} \text{mg}_{cat}^{-1}$        | 15.72                     | -0.35                    | 20   |
| FL-VS <sub>2</sub>                              | 34.62 $\mu\text{g h}^{-1} \text{mg}_{cat}^{-1}$        | 2.09                      | -0.6                     | 21   |

**Table S7** Formation free energies of the occupying species on FeS<sub>2-x</sub> at -0.2 V<sub>RHE</sub>.

| Species                    | H <sub>2</sub> O* | HO*  | O*   | N <sub>2</sub> * |
|----------------------------|-------------------|------|------|------------------|
| Formation free energy (eV) | 0.55              | 0.93 | 2.09 | -1.00            |

Note: The reason for choosing -0.2 V<sub>RHE</sub> for analysis is because previous works demonstrated that FeS<sub>2</sub> can achieve a high Faradaic efficiency at around -0.2 V<sub>RHE</sub>.<sup>5</sup> The formation free energy ( $\Delta E_{form}$ ) of occupied species on FeS<sub>2-x</sub> surface was calculated *via* Eq. (1):

$$\Delta E_{form} = E_{H_m O^*} + (2 - m) * (0.5 * E_{H_2} - U_{SHE} - 2.303 * k * T * pH) - E_{FeS_{2-x}} - E_{H_2O} \quad (1)$$

where m is the number of H of occupied species (H<sub>2</sub>O\*, HO\*, and O\*).  $E_{H_2O}$ ,  $E_{H_2}$ ,  $E_{FeS_{2-x}}$ , and  $E_{H_m O^*}$  are the energies of H<sub>2</sub>O molecule, H<sub>2</sub> molecule, FeS<sub>2-x</sub> surface, and FeS<sub>2-x</sub> surfaces with adsorbed species, respectively.  $U_{SHE}$ ,  $k_B$ , and  $T$  are the potential under the scale of standard hydrogen electrode (SHE), the Boltzmann constant, and temperature, respectively.

## Reference

1. S. Kment, H. Kmentova, A. Sarkar, R. J. Soukup, N. J. Ianno, D. Sekora, J. Olejnicek, P. Ksirova, J. Krysa, Z. Remes and Z. Hubicka, *J. Alloy. Compd.*, 2014, **607**, 169-176.
2. Z. Feng, G. Li, X. Wang, C. J. Gómez-García, J. Xin, H. Ma, H. Pang and K. Gao, *Chem. Eng. J.*, 2022, **445**, 136797.
3. H. Du, C. Yang, W. Pu, L. Zeng and J. Gong, *ACS Sustain. Chem. Eng.*, 2020, **8**, 10572-10580.
4. L. Gao, C. Guo, M. Zhao, H. Yang, X. Ma, C. Liu, X. Liu, X. Sun and Q. Wei, *ACS Appl. Mater. Interfaces*, 2021, **13**, 50027-50036.
5. D. Feng, X. Zhang, Y. Sun and T. Ma, *Nano Mater. Sci.*, 2020, **2**, 132-139.
6. M. Yang, Z. Jin, C. Wang, X. Cao, X. Wang, H. Ma, H. Pang, L. Tan and G. Yang, *ACS Appl. Mater. Interfaces*, 2021, **13**, 55040-55050.
7. H. B. Wang, J. Q. Wang, R. Zhang, C. Q. Cheng, K. W. Qiu, Y. J. Yang, J. Mao, H. Liu, M. Du, C. K. Dong and X. W. Du, *ACS Catal.*, 2020, **10**, 4914-4921.
8. G. Zhang, F. Wang, K. Chen, J. Kang and K. Chu, *Adv. Funct. Mater.*, 2023, 2305372.
9. Q. Li, Y. Guo, Y. Tian, W. Liu and K. Chu, *J. Mater. Chem. A*, 2020, **8**, 16195-16202.
10. K. Chu, J. Wang, Y. P. Liu, Q. Q. Li and Y. L. Guo, *J. Mater. Chem. A*, 2020, **8**, 7117-7124.
11. M. Zhao, C. Guo, L. Gao, X. Kuang, H. Yang, X. Ma, C. Liu, X. Liu, X. Sun and Q. Wei, *Inorg. Chem. Front.*, 2021, **8**, 3266-3272.
12. X. Li, T. Li, Y. Ma, Q. Wei, W. Qiu, H. Guo, X. Shi, P. Zhang, A. M. Asiri, L. Chen, B. Tang and X. Sun, *Adv. Energy Mater.*, 2018, **8**, 1801357.
13. W. Liao, K. Xie, L. Liu, X. Wang, Y. Luo, S. Liang, F. Liu, and L. Jiang, *J. Energy Chem.*, 2021, **62**, 359-366.
14. M. You, S. Yi, X. Hou, Z. Wang, H. Ji, L. Zhang, Y. Wang, Z. Zhang and D. Chen, *J. Colloid. Interface Sci.*, 2021, **599**, 849-856.
15. Y. Liu, M. Han, Q. Xiong, S. Zhang, C. Zhao, W. Gong, G. Wang, H. Zhang and H. Zhao, *Adv. Energy Mater.*, 2019, **9**, 1803935.
16. K. Chu, Y. P. Liu, Y. B. Li, Y. L. Guo and Y. Tian, T., *ACS Appl. Mater. Interfaces*, 2020, **12**, 7081-7090.
17. P. Li, W. Fu, P. Zhuang, Y. Cao, C. Tang, A. B. Watson, P. Dong, J. Shen and M. Ye, *Small*, 2019, **15**, e1902535.
18. X. Li, X. Ren, X. Liu, J. Zhao, X. Sun, Y. Zhang, X. Kuang, T. Yan, Q. Wei and D. Wu, *J. Mater. Chem. A*, 2019, **7**, 2524-2528.

19. X. W. Lv, X. L. Liu, Y. J. Suo, Y. P. Liu and Z. Y. Yuan, *ACS Nano*, 2021, **15**, 12109-12118.
20. L. Niu, D. Wang, K. Xu, W. Hao, L. An, Z. Kang and Z. Sun, *Nano Res.*, 2021, **14**, 4093-4099.
21. L. Zhao, R. Zhao, Y. Zhou, X. Wang, X. Chi, Y. Xiong, C. Li, Y. Zhao, H. Wang, Z. Yang and Y. M. Yan, *J. Mater. Chem. A*, 2021, **9**, 24985-24992.
